# Supplementary material for: Probing the effects of microwave irradiation on enzyme-catalysed organic transformations: the case of lipase-catalysed transesterification reactions
Source: Royal Society of Chemistry journal article supplement (doi:10.1039/b617544a), 2007-01-01
Supplement: b617544a.pdf [file b617544a.pdf]

ESI

# Probing the effects of microwave irradiation on enzyme-catalysed organic transformations: The case of lipase-catalysed transesterification reactions

Nicholas E. Leadbeater, Lauren M. Stencel and Eric C. Wood

5

## Heating profiles for reactions

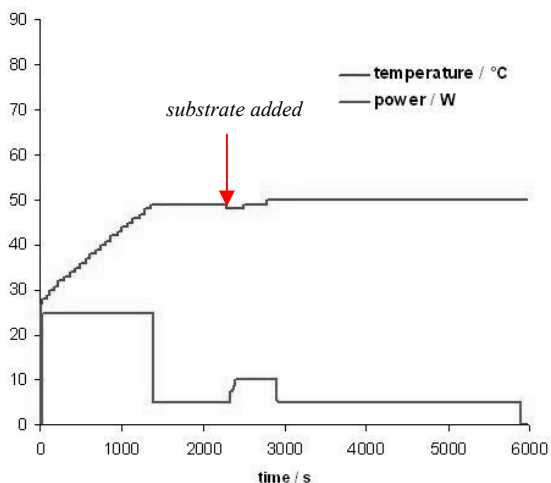

10 Power and temperature vs time profiles for the lipase catalysed transesterification between methylacetoacetate and *n*-propanol at 50 °C with no cooling

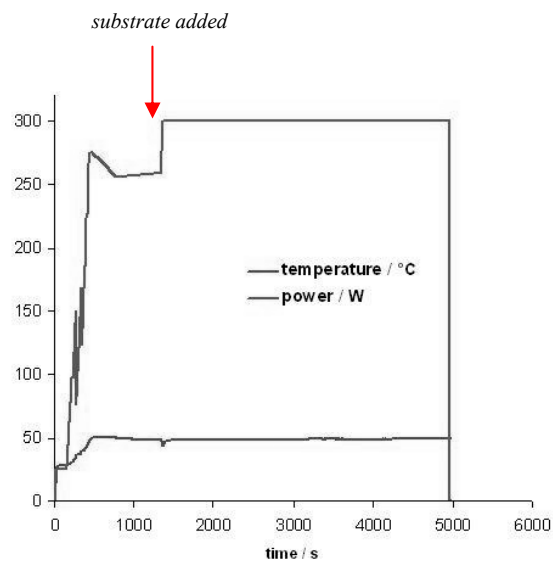

25 Power and temperature vs time profiles for the lipase catalysed transesterification between methylacetoacetate and *n*-propanol at 50 °C with cryogenic fluid cooling

15

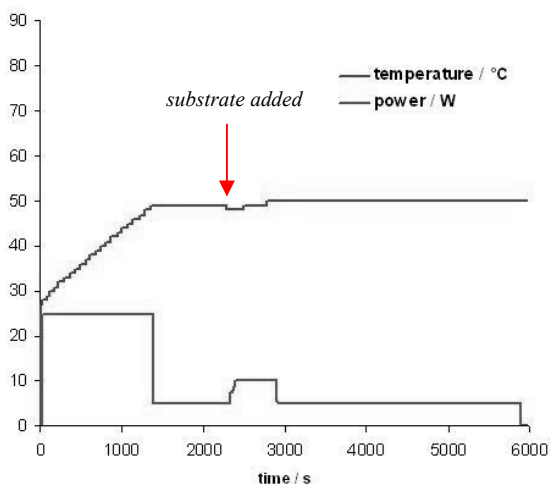

20 Power and temperature vs time profiles for the lipase catalysed transesterification between methylacetoacetate and *n*-propanol at 50 °C with air cooling
